# Supplementary material
Source: Springer Nature journal article supplement (https://www.springermedizin.de/resource/supplementary/12879_2012_1931_MOESM4_ESM.pdf/9443270)

# Diagnostic sensitivity of LAM point-of-care assay used alone or in combination with other assays

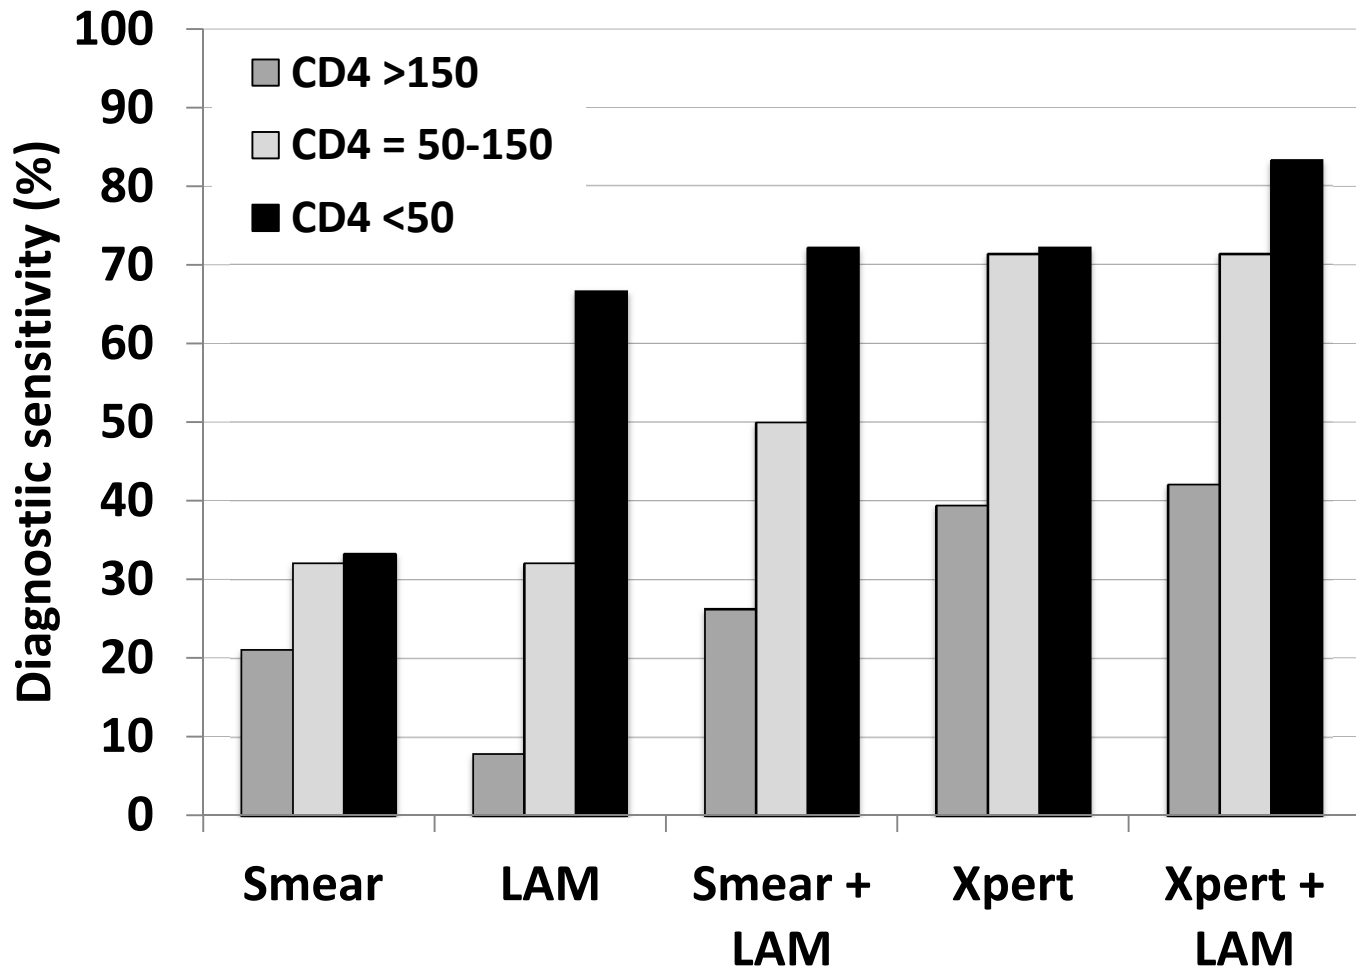

Supplement: MOESM4 [file 9443270]
